# Supplementary material for: Fitmunk: improving protein structures by accurate, automatic modeling of side-chain conformations
Source: PubMed Central journal article supplement (PMC4756610; doi:10.1107/s2059798315024730), 2016-01-28
Supplement: d-72-00266-sup1.pdf [file d-72-00266-sup1.pdf]

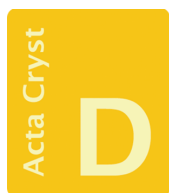

STRUCTURAL  
BIOLOGY

**Volume 72 (2016)**

**Supporting information for article:**

***Fitmunk*: improving protein structures by accurate, automatic  
modelling of side-chain conformations**

**Przemyslaw Jerzy Porebski, Marcin Cymborowski, Marta Pasenkiewicz-Gierula  
and Wlodek Minor**

**Table S1** Comparison of R,  $R_{\text{free}}$ , *Molprobity* score and clashscore between structures from TS set refined and non-refined using *Fitmunk*.

| Resolution bin | Median R factor difference | Median $R_{\text{free}}$ factor difference | Median <i>Molprobity</i> score difference | Median clashscore difference |
|----------------|----------------------------|--------------------------------------------|-------------------------------------------|------------------------------|
| [0.9, 1.2]     | -0.0008                    | -0.0001                                    | -0.01                                     | 0.00                         |
| (1.2, 1.4]     | -0.0010                    | 0.0001                                     | -0.07                                     | -0.26                        |
| (1.4, 1.6]     | -0.0011                    | 0.0001                                     | -0.05                                     | -0.11                        |
| (1.6, 1.8]     | -0.0013                    | 0.0003                                     | -0.14                                     | -0.38                        |
| (1.8, 2]       | -0.0014                    | -0.0004                                    | -0.17                                     | -0.69                        |
| (2, 2.2]       | -0.0019                    | -0.0007                                    | -0.17                                     | -0.89                        |
| (2.2, 2.4]     | -0.0025                    | -0.0009                                    | -0.24                                     | -1.40                        |
| (2.4, 2.6]     | -0.0026                    | -0.0003                                    | -0.28                                     | -1.59                        |
| (2.6, 2.8]     | -0.0023                    | -0.0012                                    | -0.34                                     | -2.85                        |
| (2.8, 3]       | -0.0020                    | -0.0011                                    | -0.40                                     | -4.39                        |
| (3, 3.5]       | -0.0008                    | -0.0007                                    | -0.48                                     | -5.64                        |

**Table S2** Comparison of accuracy, ED adjusted accuracy, percentage of sidechains with insignificant ED and percentage of residues improved by *Fitmunk*

| Resolution bin | Median accuracy per structure [%] | Median ED adjusted accuracy per structure [%] | Median % of residues in a structure with insignificant density for sidechain | Median % of residues in a structure that were improved by <i>Fitmunk</i> in terms of density fit |
|----------------|-----------------------------------|-----------------------------------------------|------------------------------------------------------------------------------|--------------------------------------------------------------------------------------------------|
| [0.9, 1.2]     | 96.5                              | 99.0                                          | 0.4                                                                          | 1.7                                                                                              |
| (1.2, 1.4]     | 96.0                              | 99.4                                          | 0.6                                                                          | 2.6                                                                                              |
| (1.4, 1.6]     | 95.7                              | 99.5                                          | 0.8                                                                          | 3.0                                                                                              |
| (1.6, 1.8]     | 93.8                              | 99.4                                          | 1.0                                                                          | 4.5                                                                                              |
| (1.8, 2]       | 92.9                              | 99.1                                          | 1.4                                                                          | 5.0                                                                                              |
| (2, 2.2]       | 90.1                              | 98.6                                          | 2.2                                                                          | 6.5                                                                                              |
| (2.2, 2.4]     | 87.2                              | 97.7                                          | 3.7                                                                          | 8.0                                                                                              |
| (2.4, 2.6]     | 83.5                              | 97.3                                          | 6.0                                                                          | 10.1                                                                                             |
| (2.6, 2.8]     | 80.7                              | 97.3                                          | 8.5                                                                          | 13.1                                                                                             |
| (2.8, 3]       | 75.2                              | 96.6                                          | 16.1                                                                         | 14.4                                                                                             |
| (3, 3.5]       | 70.8                              | 95.7                                          | 27.5                                                                         | 16.8                                                                                             |
